# Supplementary material for: The vanRCd Mutation 343A>G, Resulting in a Thr115Ala Substitution, Is Associated with an Elevated Minimum Inhibitory Concentration (MIC) of Vancomycin in Clostridioides difficile Clinical Isolates from Florida
Source: PubMed Central journal article supplement (PMC10269549; doi:10.1128/spectrum.03777-22), 2023-05-01
Supplement: spectrum.03777-22-s0001.pdf [file spectrum.03777-22-s0001.pdf]

1 **TABLE S1** Genome assembly parameters

| Contig measurements | TGH35   | TGH64   | TGH120  | TGH33   | TGH51   |
|---------------------|---------|---------|---------|---------|---------|
| N75                 | 80573   | 80573   | 104765  | 135548  | 125864  |
| N50                 | 141174  | 150740  | 490002  | 218943  | 205835  |
| N25                 | 236835  | 236932  | 604901  | 377544  | 373192  |
| Minimum             | 1019    | 1019    | 1033    | 1004    | 1029    |
| Maximum             | 353588  | 353716  | 998276  | 489189  | 489190  |
| Average             | 72423   | 70165   | 108667  | 86928   | 78895   |
| Count               | 57      | 59      | 37      | 48      | 54      |
| Total               | 4128136 | 4139722 | 4020692 | 4172520 | 4260308 |

2 These genome assemblies were generated with CLC Genomics Workbench 11.0.1  
 3 (Qiagen) with the following parameters: Word size 64, Minimum contig length 1000,  
 4 Mismatch cost 2, No scaffolding.

5

6 **TABLE S2** Genomic features of the novel isolates

| Strain | Genome size (bp) | GC%   | CDS  | Full length toxin-encoding    |
|--------|------------------|-------|------|-------------------------------|
|        |                  |       |      | genes                         |
| TGH35  | 4128136          | 28.61 | 3798 | <i>tcdA, tcdB, cdtA, cdtB</i> |
| TGH64  | 4139722          | 28.59 | 3832 | <i>tcdA, tcdB, cdtA, cdtB</i> |
| TGH120 | 4020692          | 28.33 | 3636 | <i>tcdA, tcdB</i>             |
| TGH33  | 4172520          | 28.67 | 3827 | <i>tcdB</i>                   |
| TGH51  | 4260308          | 28.5  | 3989 | <i>tcdB</i>                   |

- 7 Rapid Annotation using Subsystems Technology (RAST) webserver was used to
- 8 annotate the genomes. CDS: coding sequences.
